# Supplementary material for: POH1 deubiquitinates pro-interleukin-1β and restricts inflammasome activity
Source: Nat Commun. 2018 Oct 12;9:4225. doi: 10.1038/s41467-018-06455-z (PMC6185913; doi:10.1038/s41467-018-06455-z)
Supplement: Supplementary file 1 — Supplementary Information [file 41467_2018_6455_MOESM1_ESM.pdf]

# Supplementary Information

## **POH1 deubiquitinates pro-interleukin-1 $\beta$ and restricts inflammasome activity**

*Zhang et. al.*

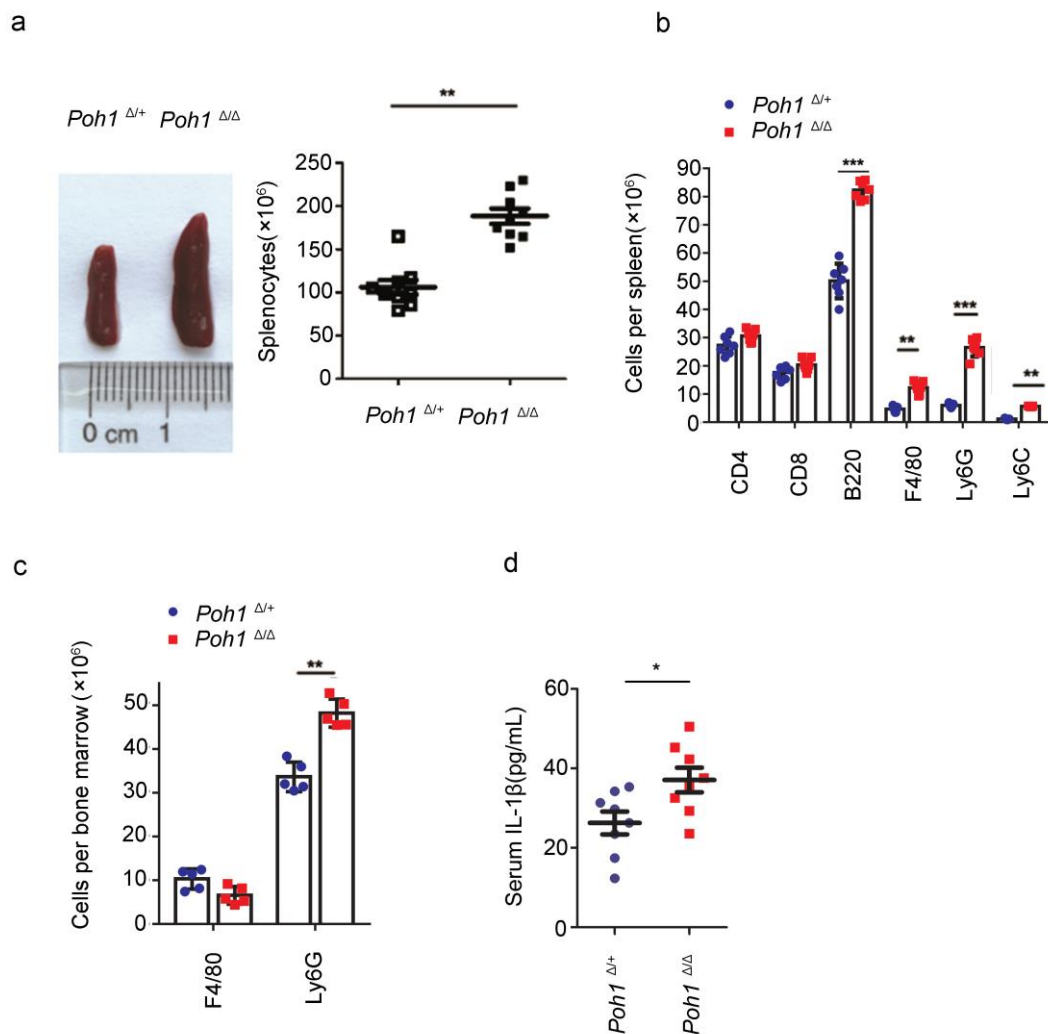

S1

**Supplementary Figure 1.** **a** Morphology (left panel) and cell numbers (right panel) of spleens in *Poh1*<sup>Δ/+</sup> and *Poh1*<sup>Δ/Δ</sup> mice (n=9 per group). **b**, **c** Single cell suspensions were prepared from the spleen and bone marrow, (**b**) absolute numbers of CD4<sup>+</sup> or CD8<sup>+</sup> T cells, B220<sup>+</sup> B cells, CD11b<sup>+</sup> F4/80<sup>+</sup> macrophages, CD11b<sup>+</sup> Ly6G<sup>+</sup> neutrophils and CD11b<sup>+</sup> Ly6C<sup>+</sup> monocytes in the spleens of *Poh1*<sup>Δ/+</sup> and *Poh1*<sup>Δ/Δ</sup> mice were measured (n=7 per group); or (**c**) absolute numbers of CD11b<sup>+</sup> F4/80<sup>+</sup> macrophages and CD11b<sup>+</sup> Ly6G<sup>+</sup> neutrophils in the bone marrow (n=5 per group) were measured. **d** ELISA quantification of the IL-1β levels in the serum of *Poh1*<sup>Δ/+</sup> and *Poh1*<sup>Δ/Δ</sup> mice

( $n=8$  mice per group). Data are pooled from (a) three or (b-d) two independent experiments (mean  $\pm$  s.d. in a-c; mean  $\pm$  s.e.m. in d), \* $p<0.05$ , \*\* $p<0.01$ , \*\*\* $p<0.001$  (two tailed Student's t-test).

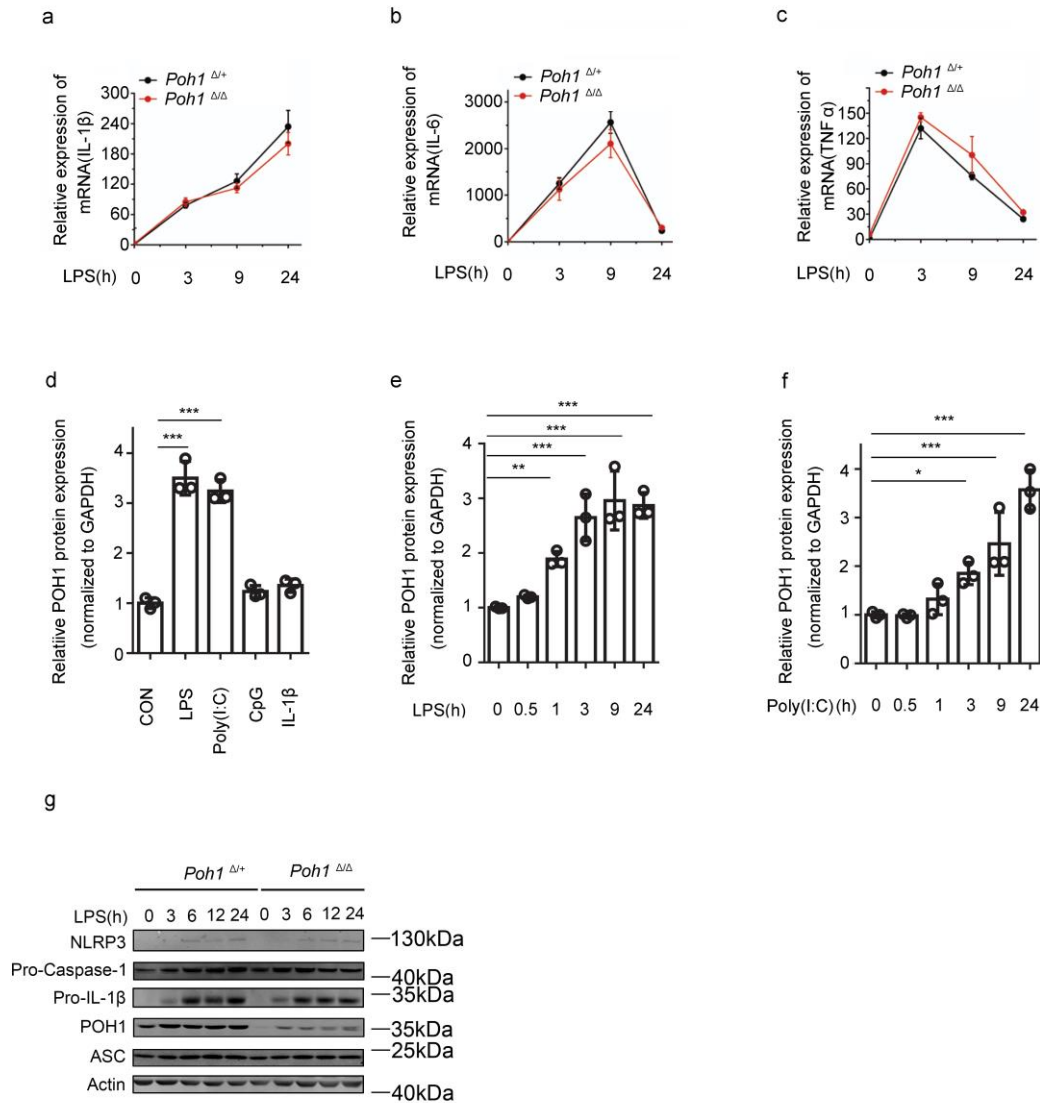

S2

**Supplementary Figure 2.** a-c BMDMs from  $Poh1^{\Delta/+}$  and  $Poh1^{\Delta/\Delta}$  mice were treated with LPS as indicated, then the mRNA levels of (a) IL-1 $\beta$ , (b) IL-6 and (c) TNF $\alpha$  were measured by RT-PCR.

Similar results were obtained from three independent experiments. The results represent the

mean  $\pm$  s.d. of three independent sets of experiments. **d-f** Quantification of western blot signal intensity for **(d)** Fig. 2a, **(e)** Fig. 2b and **(f)** Fig. 2c from three independent experiments, data presented as the mean  $\pm$  s.d. , \* $p$ <0.05, \*\* $p$ <0.01, \*\*\*  $p$ <0.001 (one-way ANOVA with Dunnett's post-hoc test). **g** BMDMs from *Pohl* <sup>$\Delta$ /+</sup> and *Pohl* <sup>$\Delta$ / $\Delta$</sup>  mice were treated with LPS as indicated, then the cell lysates were IB with the indicated antibodies. Similar results were obtained from three independent experiments.

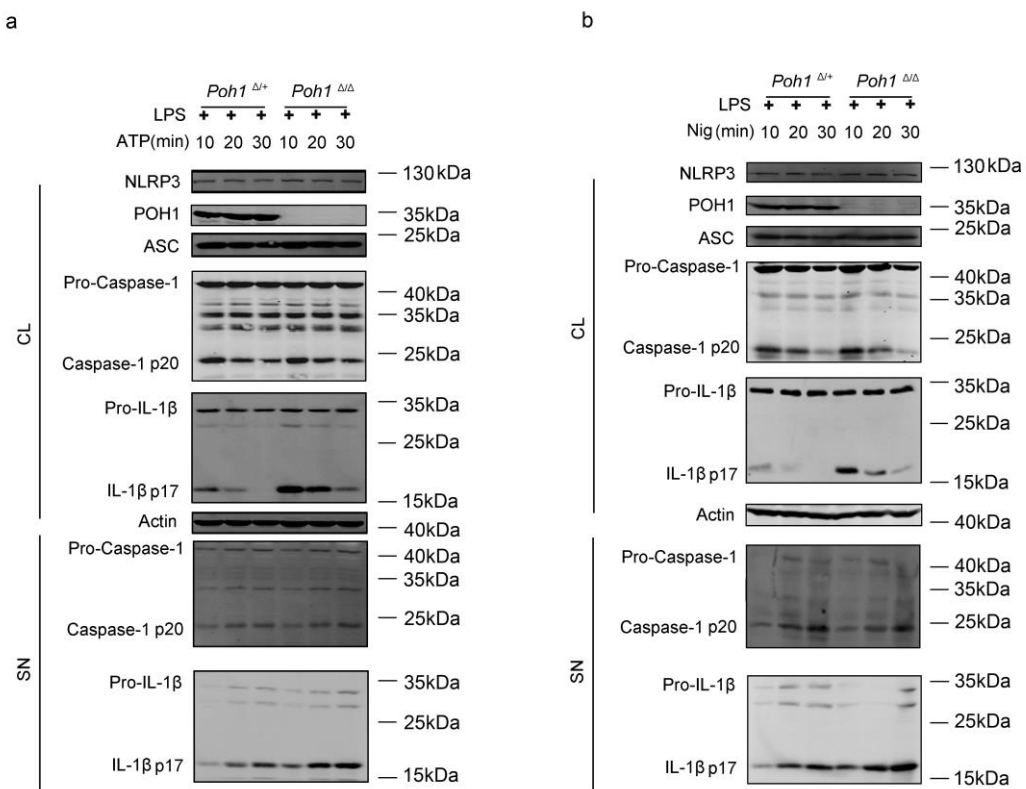

S3

**Supplementary Figure 3. a, b** BMDMs from *Pohl* <sup>$\Delta$ /+</sup> and *Pohl* <sup>$\Delta$ / $\Delta$</sup>  mice were primed with LPS, then treated with **(a)** ATP and **(b)** nigericin as indicated. The cell lysates and supernatants were IB with the indicated antibodies. Similar results were obtained from three independent experiments.

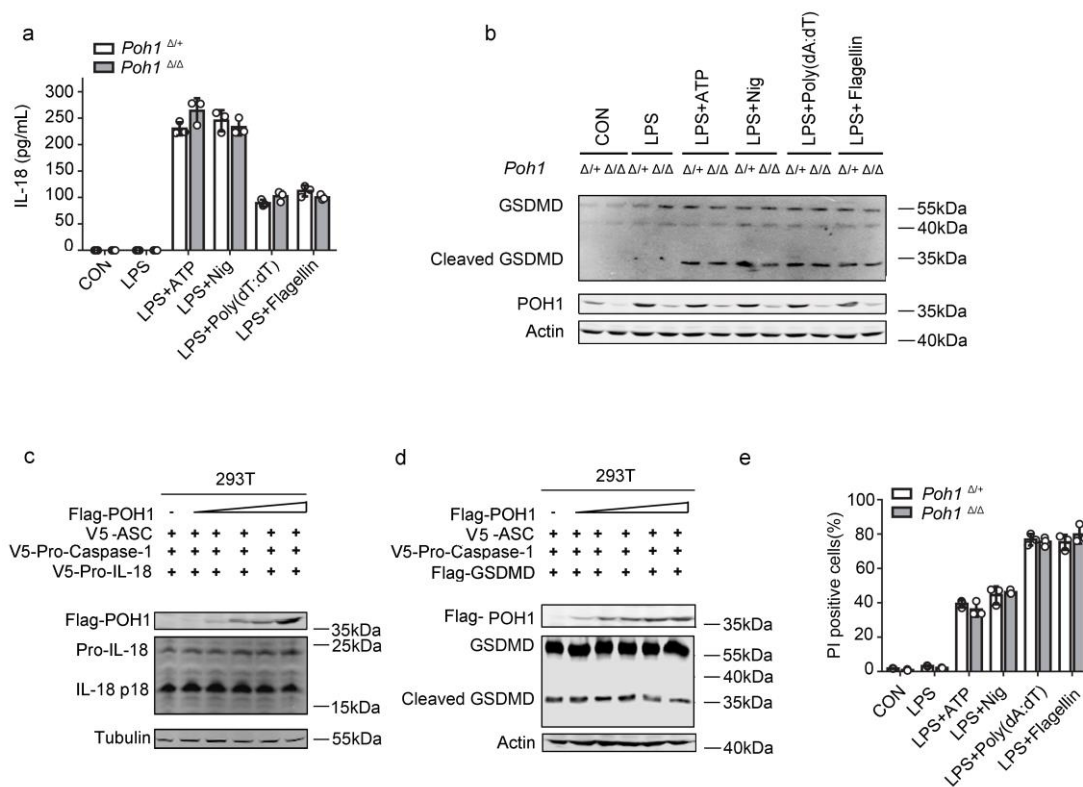

S4

**Supplementary Figure 4. a, b** *Poh1*<sup>Δ/+</sup> and *Poh1*<sup>Δ/Δ</sup> BMDMs were primed with LPS for 12-14 hrs and then stimulated with inflammasome agonists as indicated. **(a)** The IL-18 levels in supernatants were measured by ELISA. **(b)** The cell lysates were IB with the indicated antibodies. **c, d** HEK293T cells were transfected with Flag-POH1, V5-caspase-1, V5-ASC and along with **(c)** V5-pro-IL18 or **(d)** Flag-GSDMD, then the cell lysates were subjected to IB with the indicated antibodies. **e** BMDMs were treated as in **a**, then cell pyroptosis was measured by PI staining. Similar results were obtained from three independent experiments. The results represent the mean±s.d. of three independent sets of experiments.

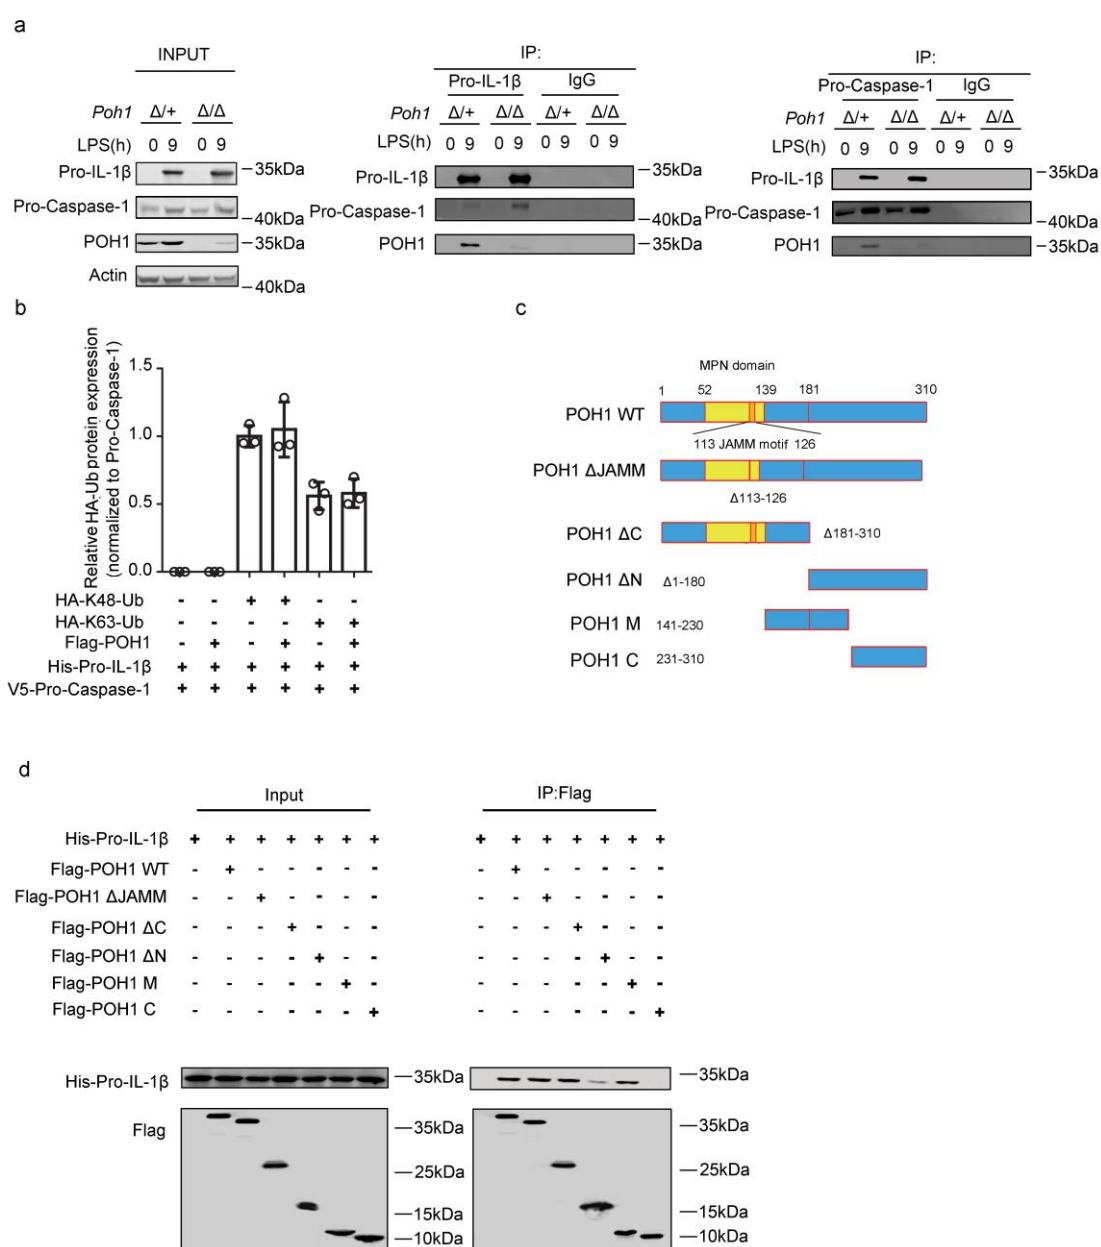

S5

**Supplementary Figure 5. a** BMDMs from *Poh1* $\Delta/+$  and *Poh1* $\Delta/\Delta$  mice were stimulated with LPS for 9 hrs, then cells were subjected to IP with an anti-pro-IL-1 $\beta$  or an anti-pro-caspase-1 antibody and IB with the indicated antibodies. **b** Quantification of ubiquitinated pro-caspase-1 for Fig. 5d from three independent experiments, data presented as the mean  $\pm$  s.d. **c** Schematic diagram of mutants of POH1. **d** HEK293T cells transfected with a plasmid encoding His-pro-IL-1 $\beta$ , Flag-POH1 (WT) or its mutants were subjected to IP with an anti-Flag antibody and IB with the indicated antibodies.

Similar results were obtained from three independent experiments.

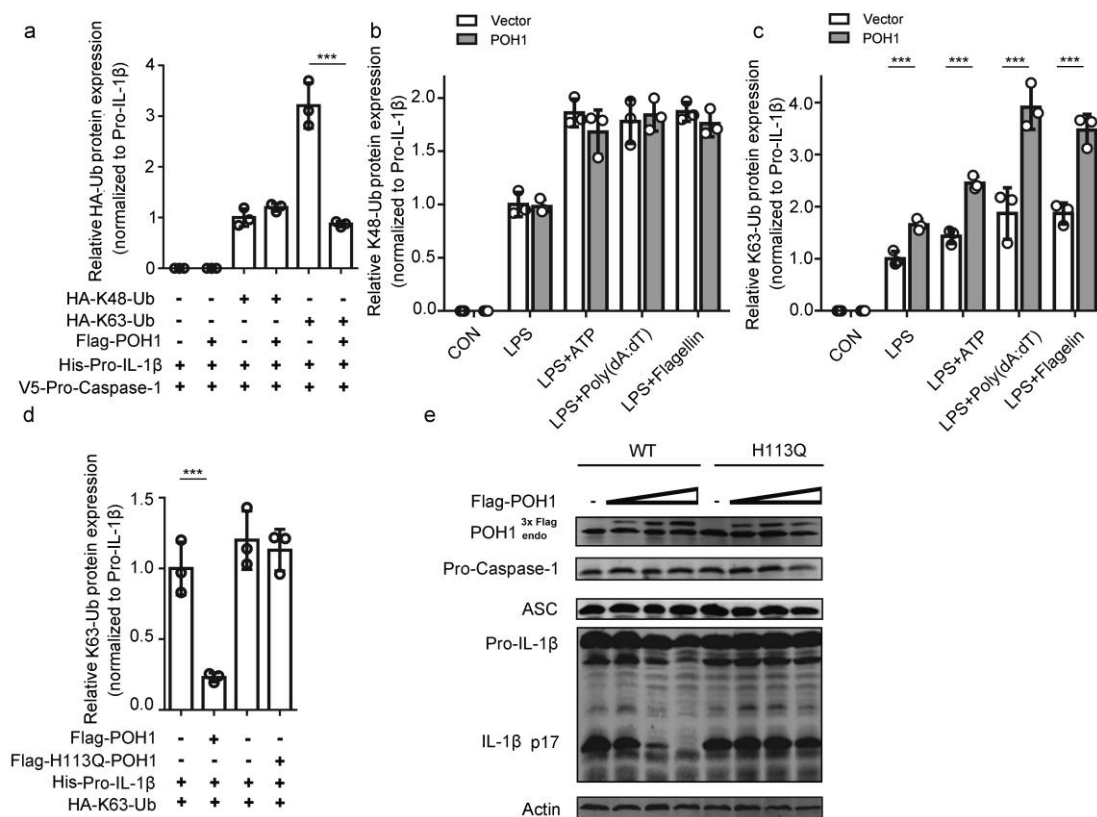

S6

**Supplementary Figure 6. a-d** Quantification of ubiquitinated pro-IL-1β for (a) Fig. 5d, (b-c) Fig. 5e and (d) Fig. 5f from three independent experiments, data presented as the mean  $\pm$  s.d., \*\*\*  $p < 0.001$ . (two tailed Student's t-test). **e** HEK293T cells were transfected with Flag-caspase-1, Vsv-ASC, His-pro-IL-1β, Flag-POH1 (WT) or Flag-H113Q-POH1, then cell lysates were subjected to IB with the indicated antibodies. Similar results were obtained from three independent experiments.

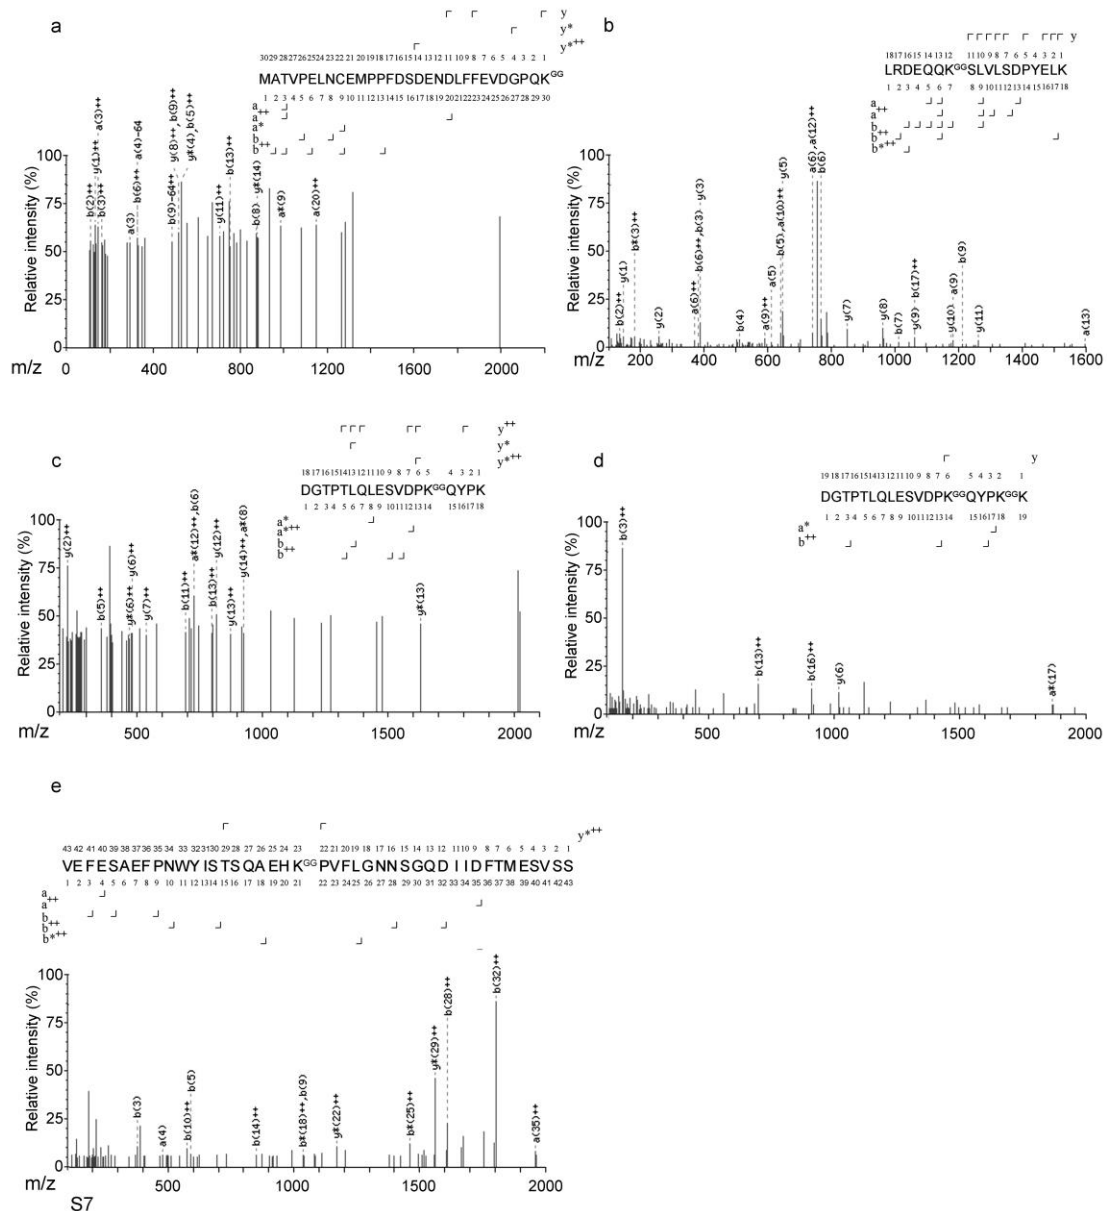

**Supplementary Figure 7.** a-e HEK293T cells transfected with a plasmid encoding His-pro-IL-1 $\beta$ , Flag-ASC, V5-pro-caspase-1 and HA-K63-only Ub were subjected to IP with an anti-His antibody and prepared for MS analysis. Sequence ions are labelled (C-terminal ions, up the sequence of indicated peptide; N-terminal ions, below the sequence of indicated peptide). Data-base search identifies 5 peptides of pro-IL-1 $\beta$ , containing GG (diglycine) remnant on (a) K30 (theoretical monoisotopic m/z = 3616.5320), (b) K133 (theoretical monoisotopic m/z = 2274.1855), (c) K205 (theoretical monoisotopic m/z = 2057.0317), (d) K205/K209 (theoretical monoisotopic m/z =

2413.2125) and **(e)** K247 (theoretical monoisotopic  $m/z = 4836.2177$ ) residues.

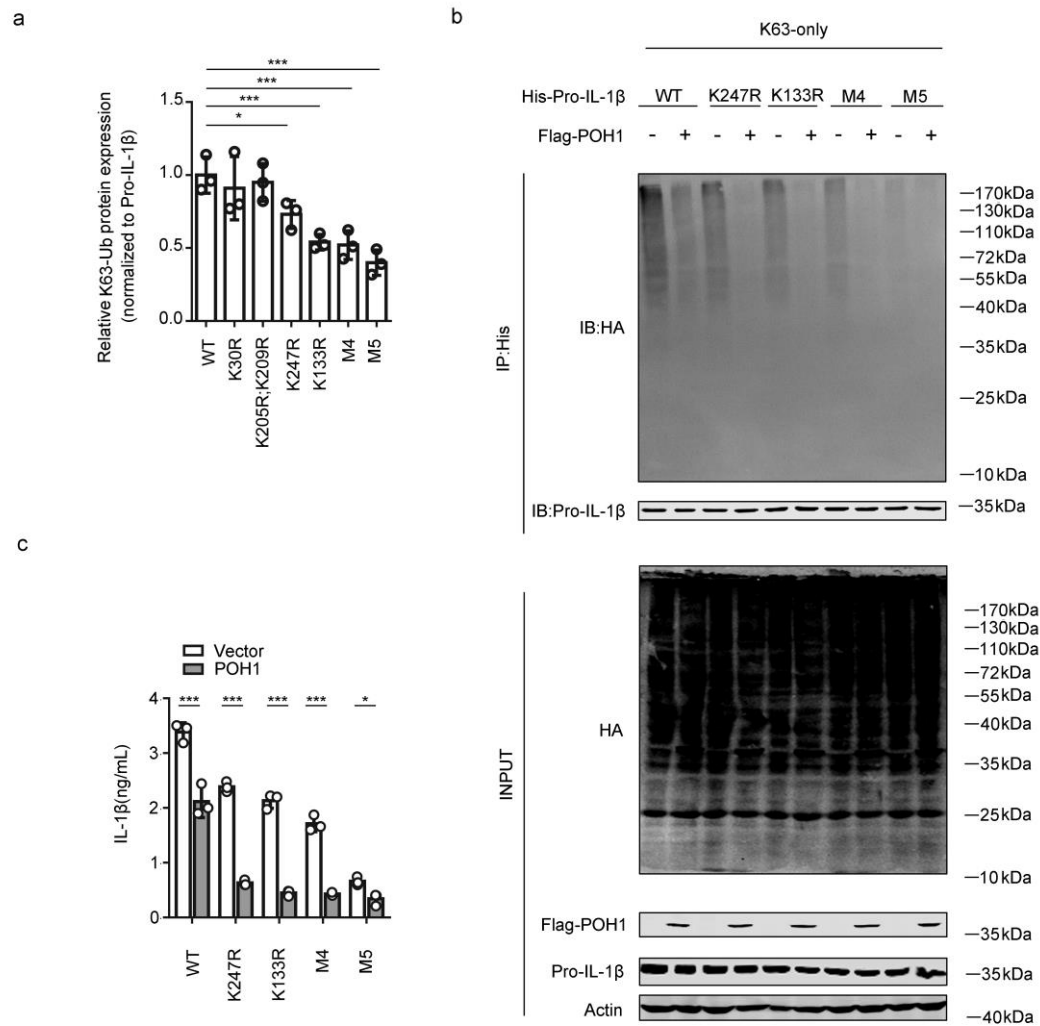

S8

**Supplementary Figure 8. a** Quantification of ubiquitinated pro-IL-1β for Fig. 6d from three independent experiments, data represent the mean  $\pm$  s.d., \* $p < 0.05$ , \*\*\*  $p < 0.001$  (one-way ANOVA with Dunnett's post-hoc test). **b, c** HEK293T cells were transfected with Flag-POH1, V5-caspase-1, V5-ASC, His-pro-IL-1β (WT) or its mutants, along **(b)** with or **(c)** without HA-tagged K63-only

Ub, then (b) cells were subjected to IP with an anti-His antibody and IB with the indicated antibodies;

(c) The IL-1 $\beta$  levels in supernatants were measured by ELISA. Similar results were obtained from three independent experiments. The results represent the mean  $\pm$  s.d. of three independent sets of experiments. \*  $p < 0.05$ , \*\*\*  $p < 0.001$  (two tailed Student's t-test).

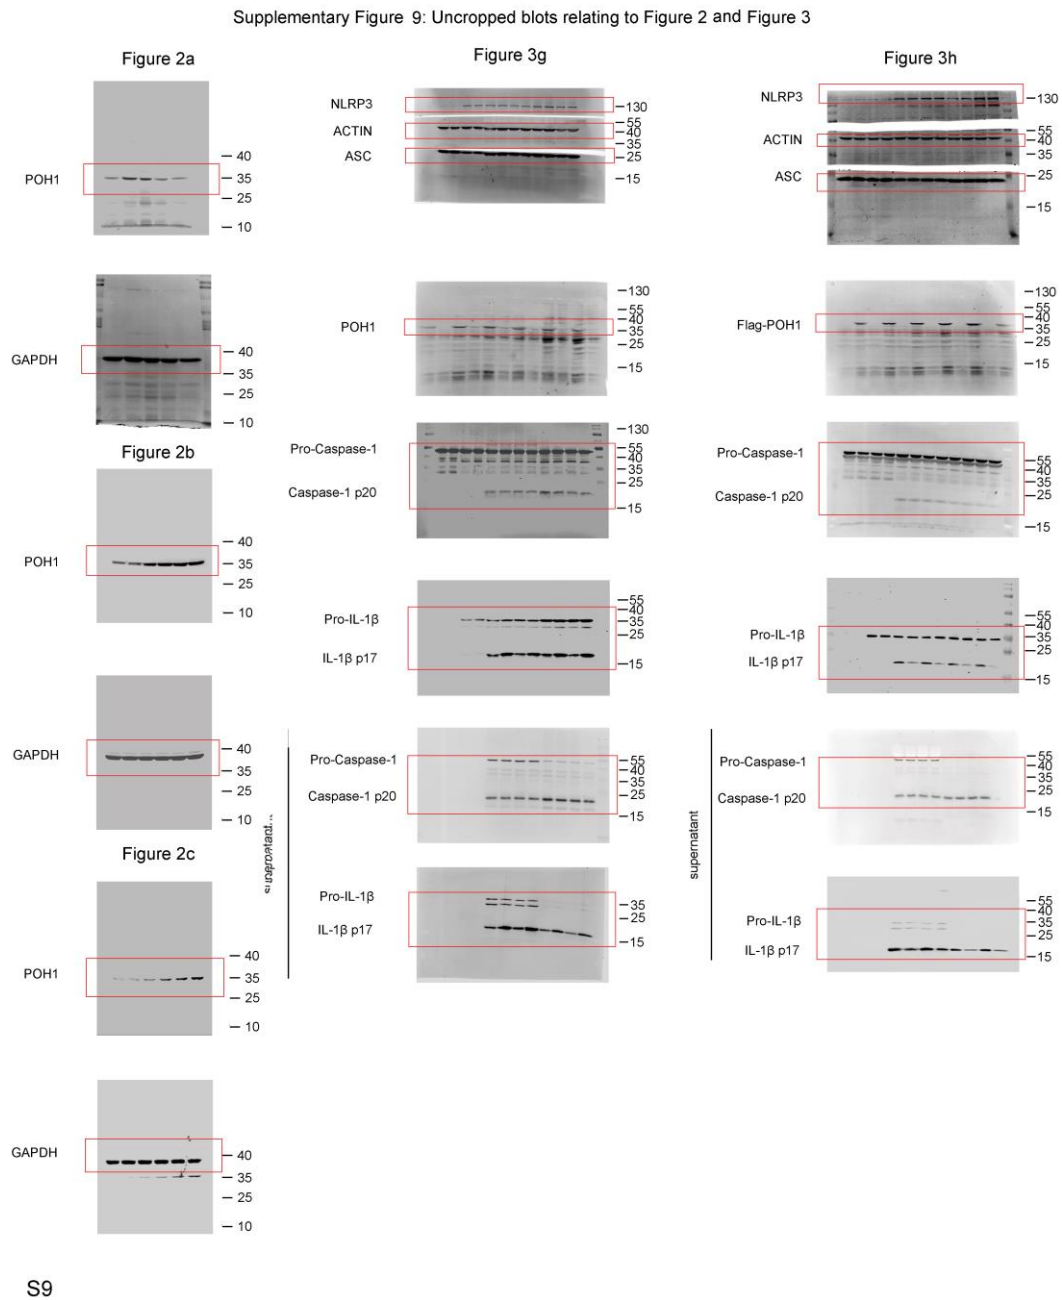

Supplementary Figure 9. Uncropped blots relating to Figure 2 and Figure 3.

Supplementary Figure10 : Uncropped blots relating to Figure 4

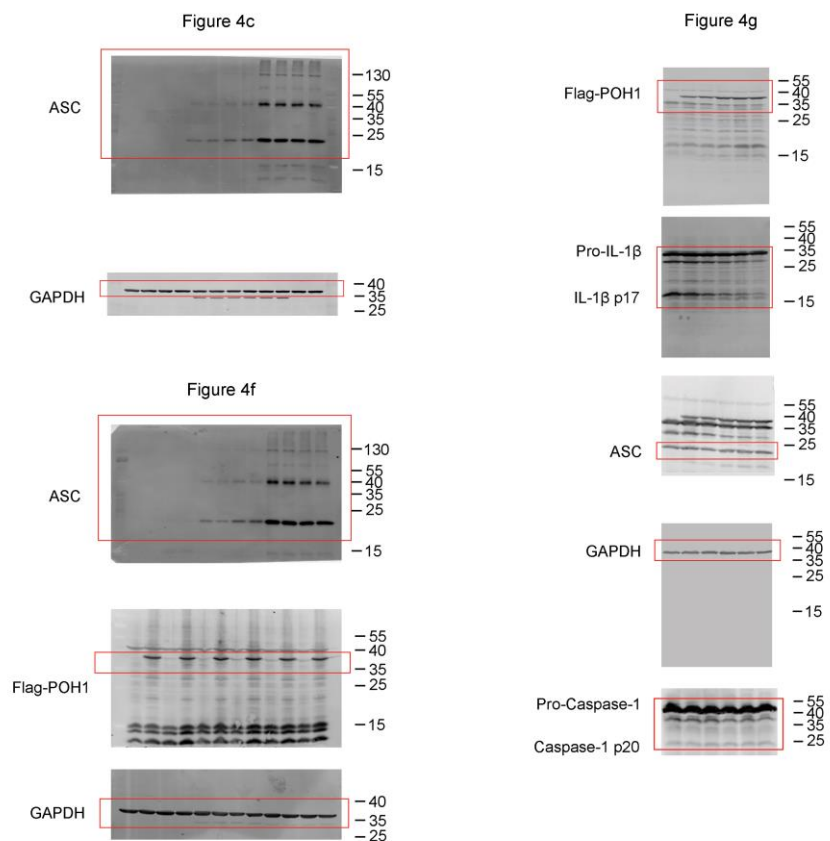

S10

**Supplementary Figure 10. Uncropped blots relating to Figure 4.**

Supplementary Figure1: Uncropped blots relating to Figure 5

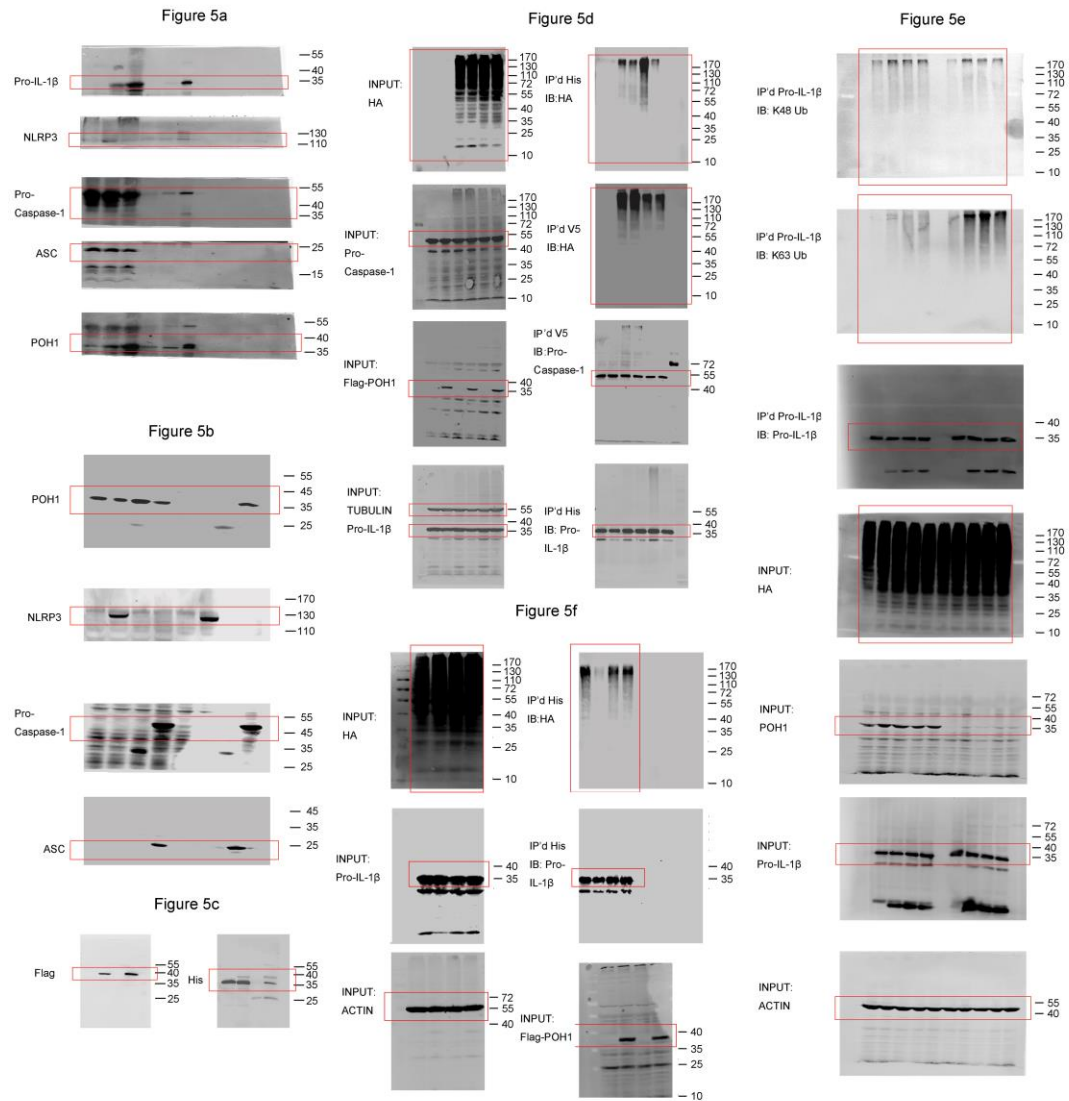

S11

Supplementary Figure 11. Uncropped blots relating to Figure 5.

Supplementary Figure12: Uncropped blots relating to Figure 6

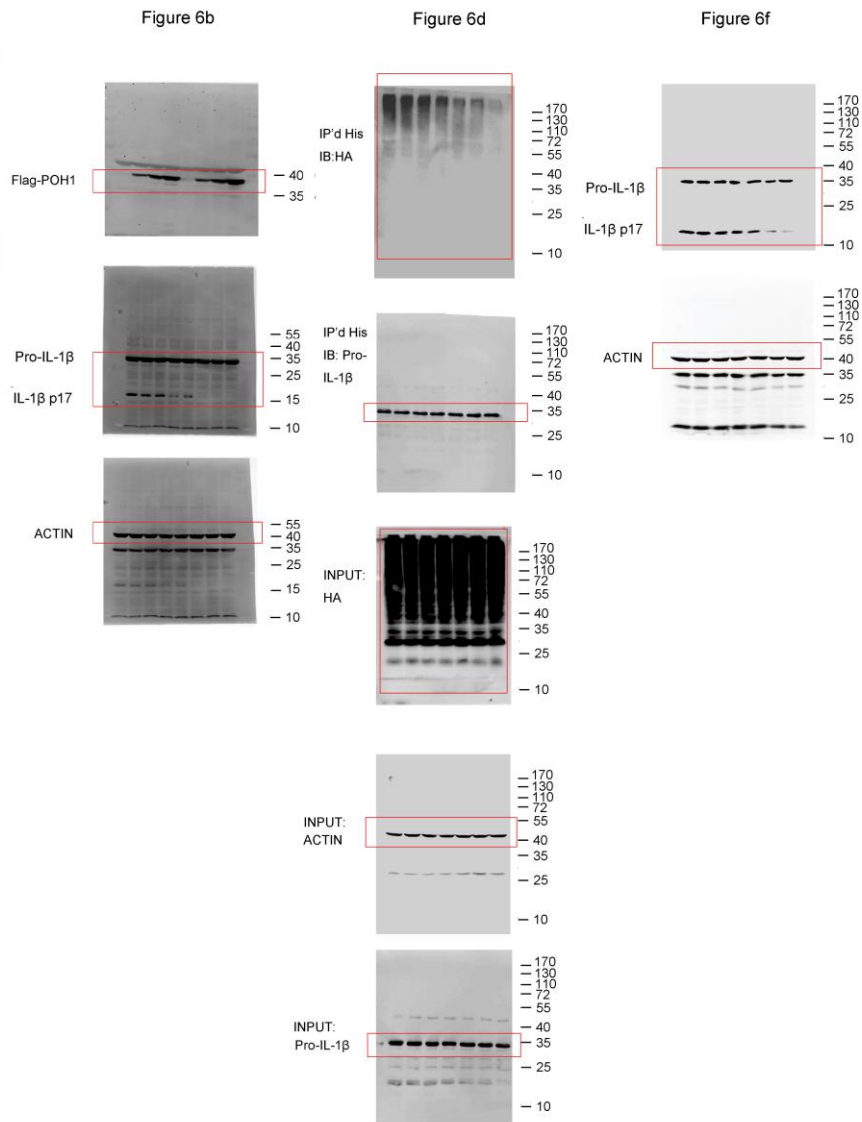

S12

Supplementary Figure 12. Uncropped blots relating to Figure 6.

Supplementary Figure 13: Uncropped blots relating to Supplementary Figure 2 and Supplementary Figure 3

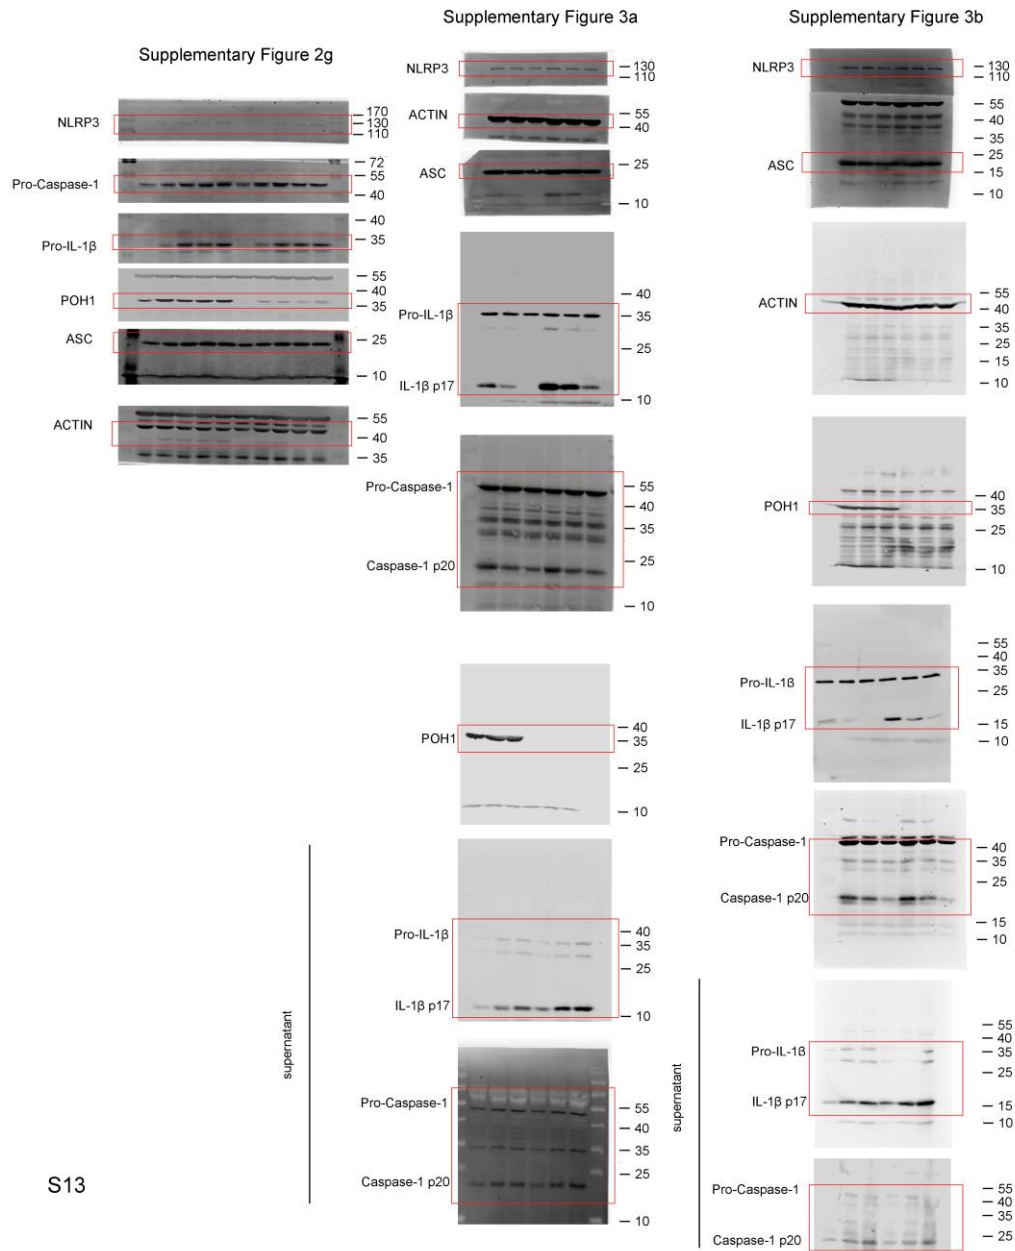

Supplementary Figure 13. Uncropped blots relating to Supplementary Figure 2 and Supplementary Figure 3.

Supplementary Figure14: Uncropped blots relateing to Supplementary Figure 4

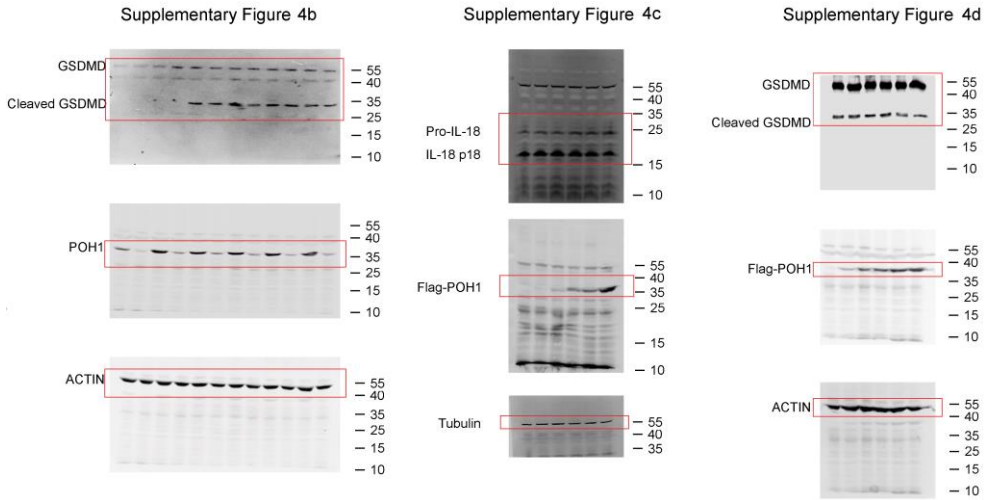

S14

**Supplementary Figure 14. Uncropped blots relating to Supplementary Figure 4.**

Supplementary Figure 5d

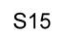

16

Supplementary Figure 16 : Uncropped blots relating to Supplementary Figure 6 and Supplementary Figure 8

Supplementary Figure 6e

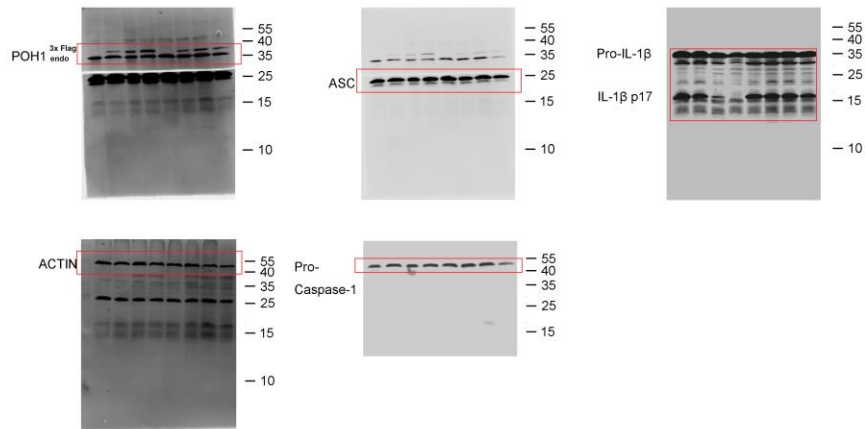

Supplementary Figure 8b

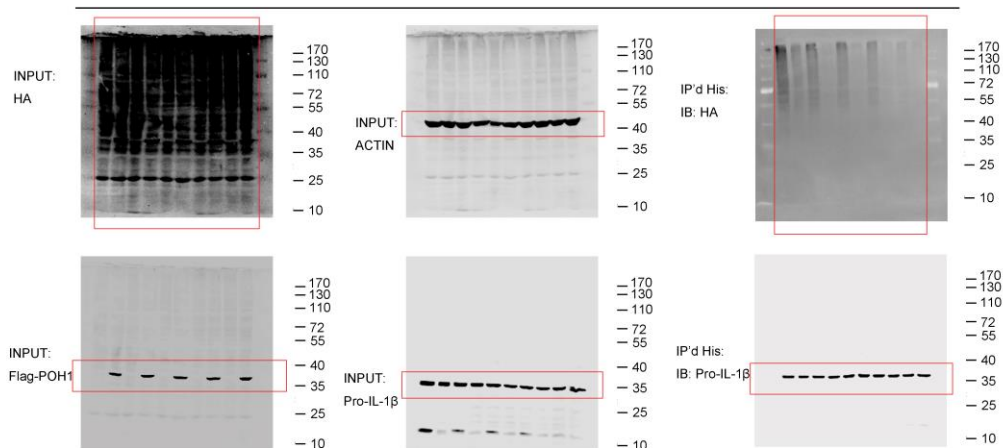

S16

**Supplementary Figure 16. Uncropped blots relating to Supplementary Figure 6 and Supplementary Figure 8.**

**a**

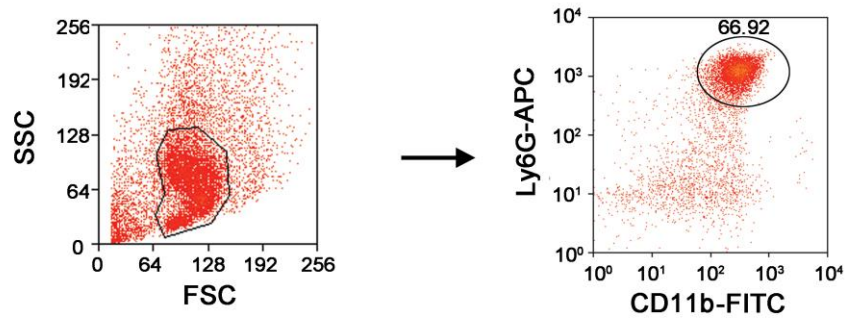

**b**

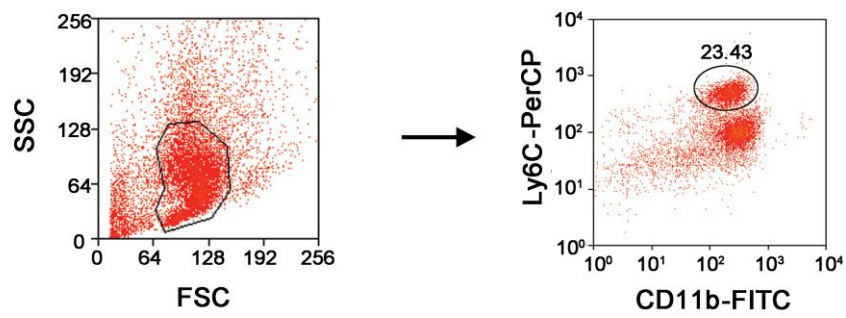

S17

**Supplementary Figure 17. a, b** Example flow spectrometry gating strategy for peritoneal **(a)** neutrophils and **(b)** monocytes.

**Supplementary Table 1. Primers used in this study for Real-Time PCR**

| <b>Primers</b>                            | <b>Sequences</b>               |
|-------------------------------------------|--------------------------------|
| Mus <i>GAPDH</i> forward                  | 5'-AGGTCGGTGTGAACGGATTTG-3'    |
| Mus <i>GAPDH</i> reverse                  | 5'-TGTAGACCATGTAGTTGAGGTCA-3'  |
| Mus <i>IL-1<math>\beta</math></i> forward | 5'-TCCAGGATGAGGACATGA-3'       |
| Mus <i>IL-1<math>\beta</math></i> reverse | 5'-GAACGTCACACACCAGCAGGTTA-3'  |
| Mus <i>IL-6</i> forward                   | 5'-ACAAAGAAATGATGGATGCTACC-3'  |
| Mus <i>IL-6</i> reverse                   | 5'-GTTGTTCTTCATGTACTCCAGGT-3'  |
| Mus <i>TNF<math>\alpha</math></i> forward | 5'-AAGCCTGTAGCCCACGTCGTA-3'    |
| Mus <i>TNF<math>\alpha</math></i> reverse | 5'-GGCACCACTAGTTGGTTGTCTTTG-3' |
| Mus <i>POH1</i> forward                   | 5'-AGTGCCTATGGAAGTTATGGGT-3'   |
| Mus <i>POH1</i> reverse                   | 5'-CTGCTTCAACACTGACACCA-3'     |
